# Supplementary material
Source: ML conference proceedings conference paper supplement (https://openreview.net/forum?id=t0fsGqGVVL)

## PriceFM

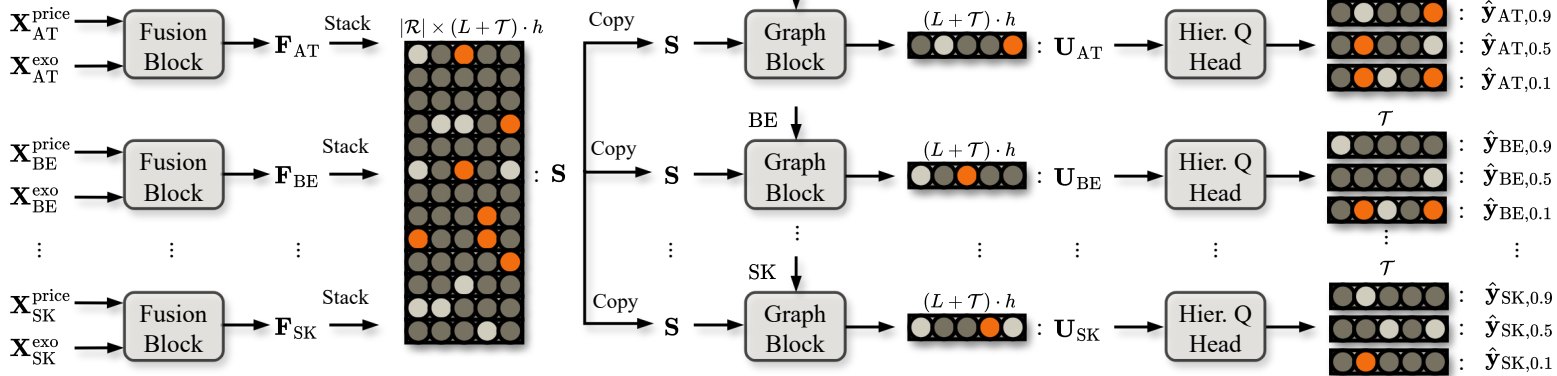

## Fusion Block

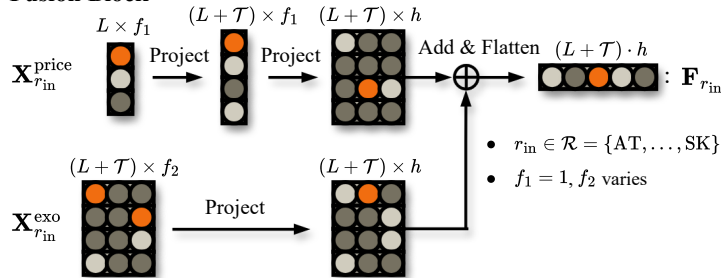

## Graph Block

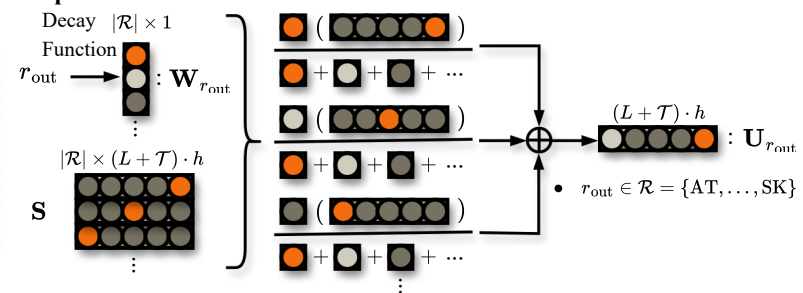

## Hierarchical Quantile Head

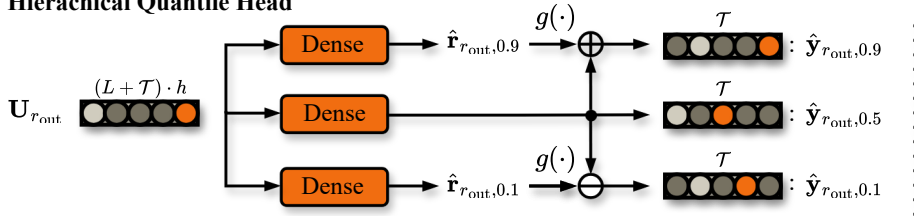

## Decay Function

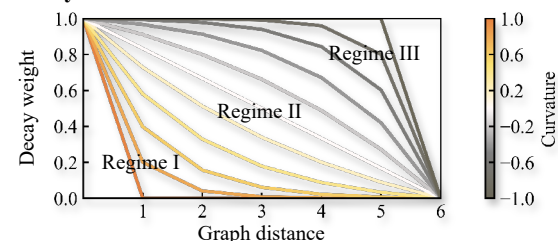

Supplement: supplementary_material [file PriceFM_structure.pdf › ICLR_PriceFM/Figure/PriceFM_structure.pdf]

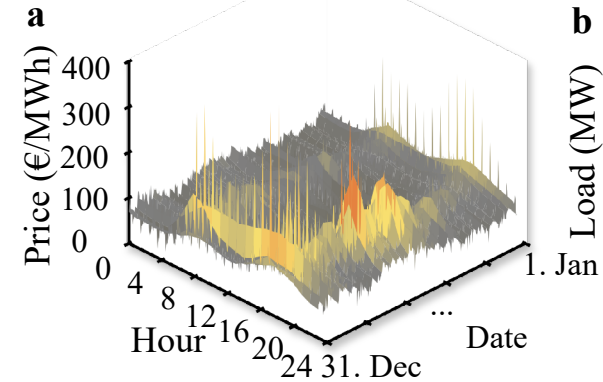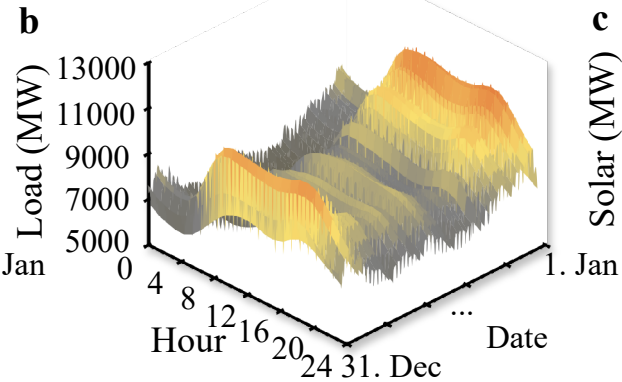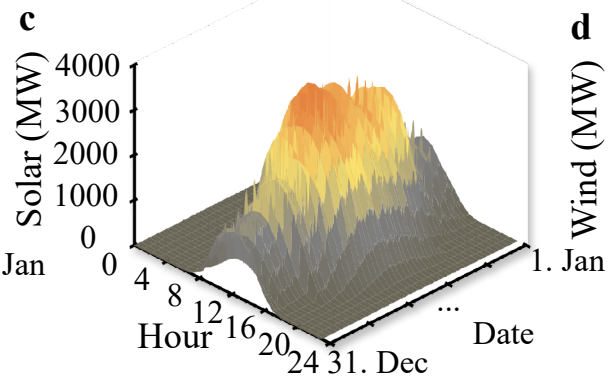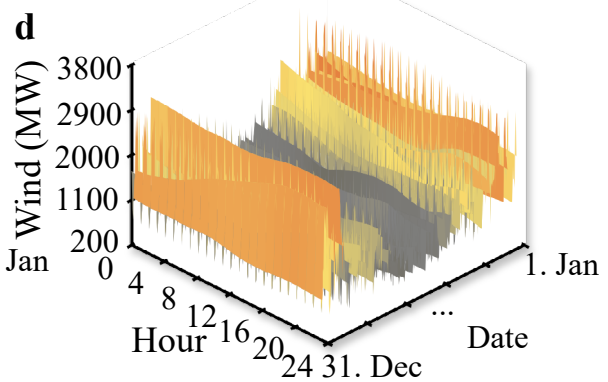

Supplement: supplementary_material [file energy_data_2024.pdf › ICLR_PriceFM/Figure/energy_data_2024.pdf]

**a**

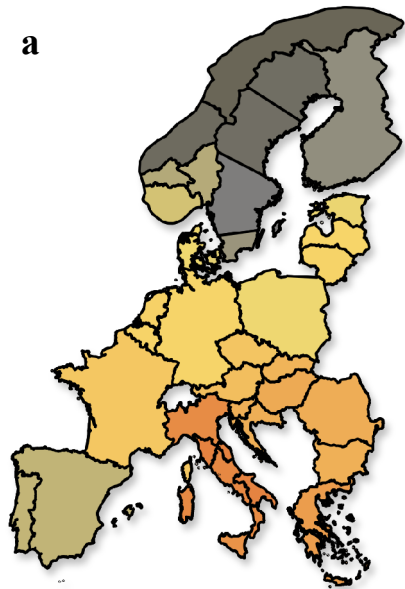

25.9 103.8 181.8

Electricity price (€/MWh)

**b**

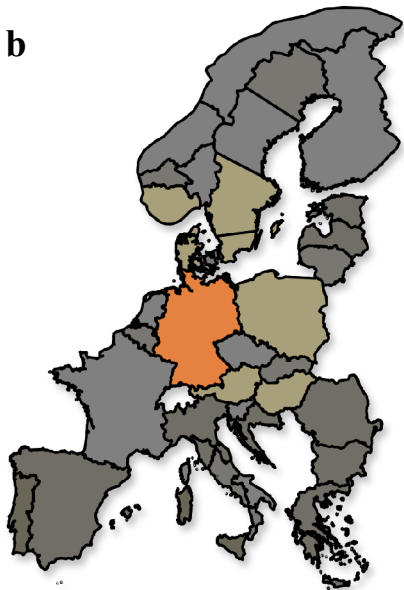

0.0 5.0 10.0

Number of neighboring regions

Supplement: supplementary_material [file spatial_price_neighbors.pdf › ICLR_PriceFM/Figure/spatial_price_neighbors.pdf]

**a**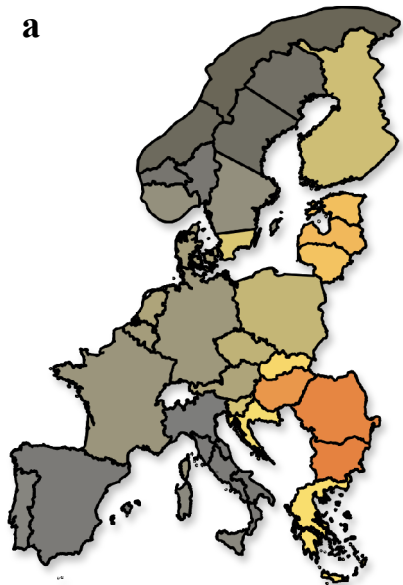

1.1    7.4    13.7

Testing loss (€/MWh)

**b**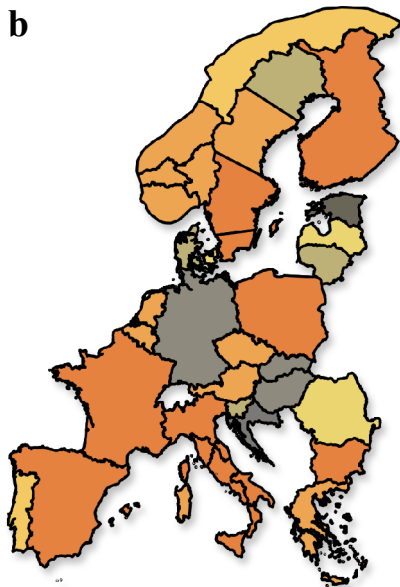

-0.6    0.2    1.0

Optimal curvature value

Supplement: supplementary_material [file spatial_testing.pdf › ICLR_PriceFM/Figure/spatial_testing.pdf]
